# Supplementary material for: Tunable abundant valley Hall effect and chiral spin–valley locking in Janus monolayer VCGeN4
Source: Royal Society of Chemistry journal article supplement (doi:10.1039/d3nr05643k), 2024-01-01
Supplement: d3nr05643k1.pdf [file d3nr05643k1.pdf]

# Supplemental Materials for “Tunable abundant valley Hall effect and chiral spin-valley locking in Janus monolayer VCGeN<sub>4</sub>”

Kang Jia<sup>1,2</sup>, Xiao-Jing Dong<sup>2</sup>, Sheng-Shi Li<sup>1</sup>, Wei-Xiao Ji<sup>1</sup>, and Chang-Wen Zhang<sup>1,2\*</sup>

1. School of Physics and Technology, Institute of Spintronics, University of Jinan, Jinan, Shandong, 250022, PRC

2. School of Physics and Physical Engineering, Qufu Normal University, Qufu, Shandong, 273100, PRC

**Table S1** The energies of different phases of VCGeN<sub>4</sub>.

| phase    | energy (eV) |
|----------|-------------|
| $\alpha$ | -50.774     |
| $\beta$  | -50.694     |
| $\gamma$ | -50.669     |
| $\delta$ | -50.769     |

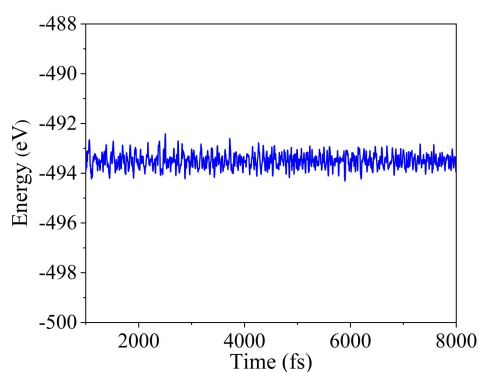

**Fig. S1** The AIMD simulation of VCGeN<sub>4</sub> at 300 K.

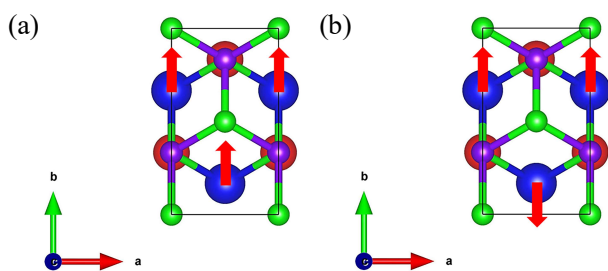

**Fig. S2** The considered magnetic configurations: panel (a) is for the FM configuration, and panel (b) is for the AFM configurations.

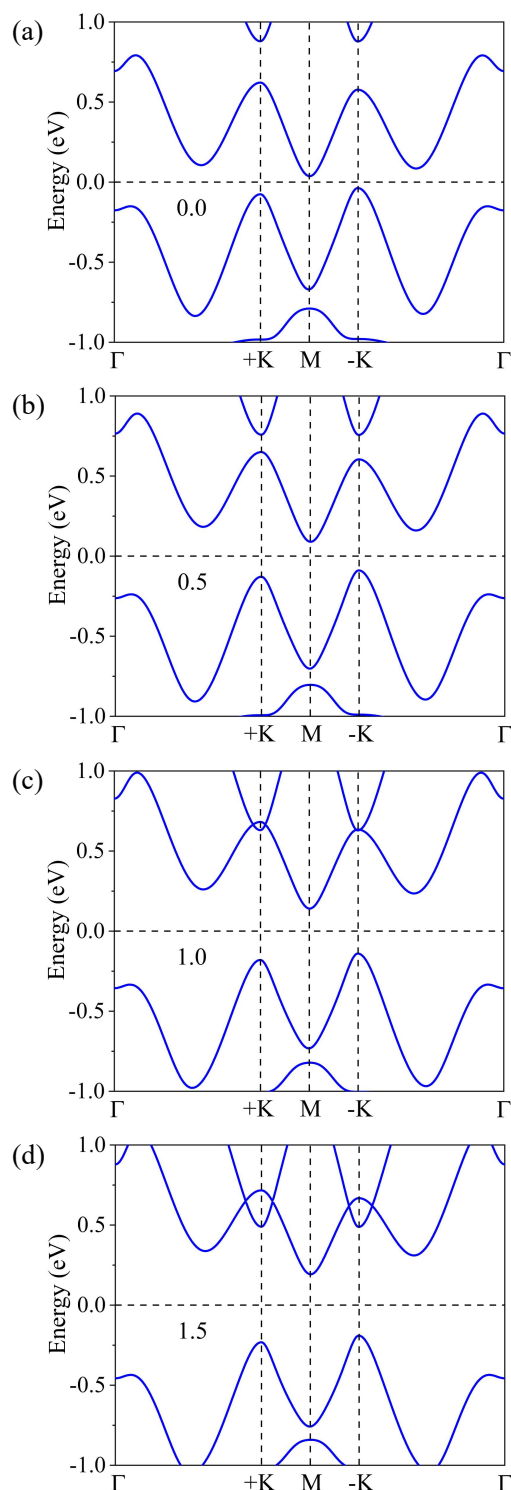

magnetization.

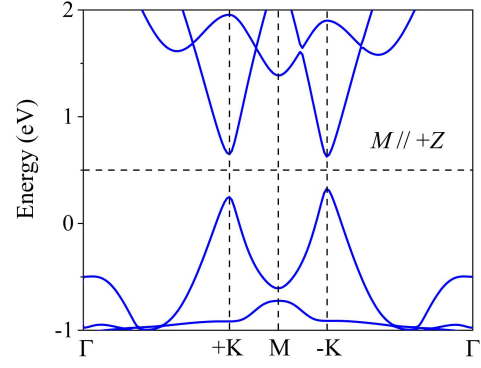

**Fig. S4** The band structure of the VCGeN<sub>4</sub> by the HSE06 functional with OOP magnetization.

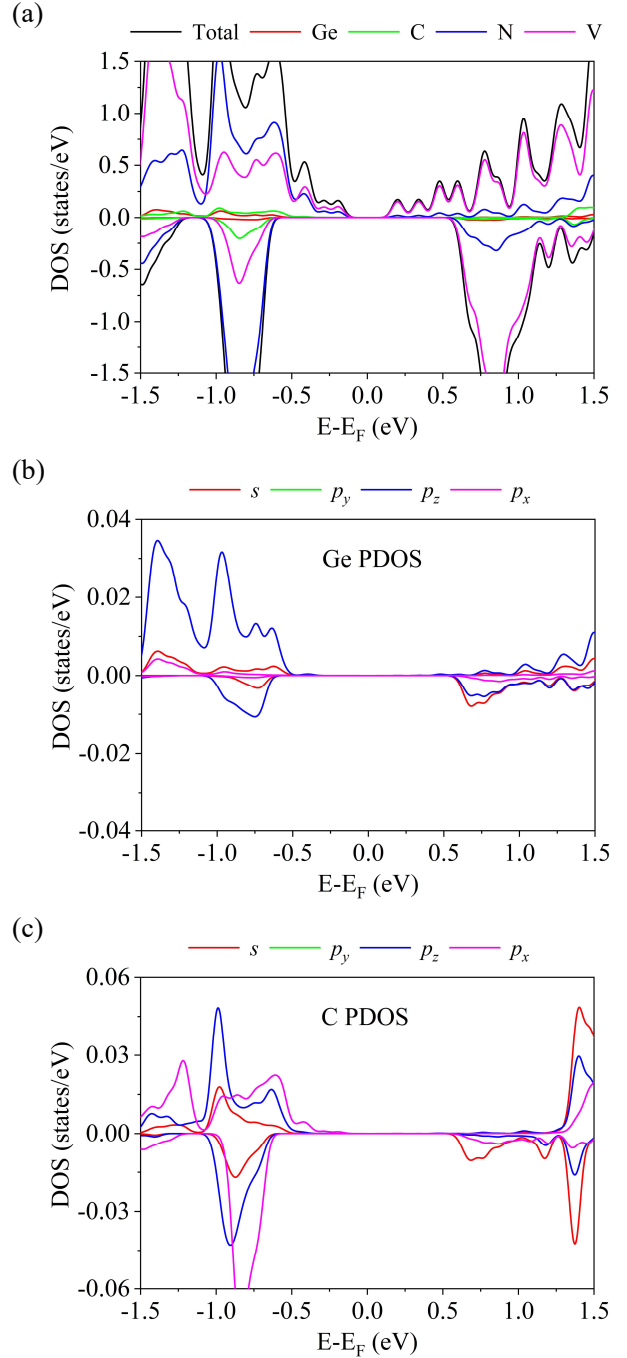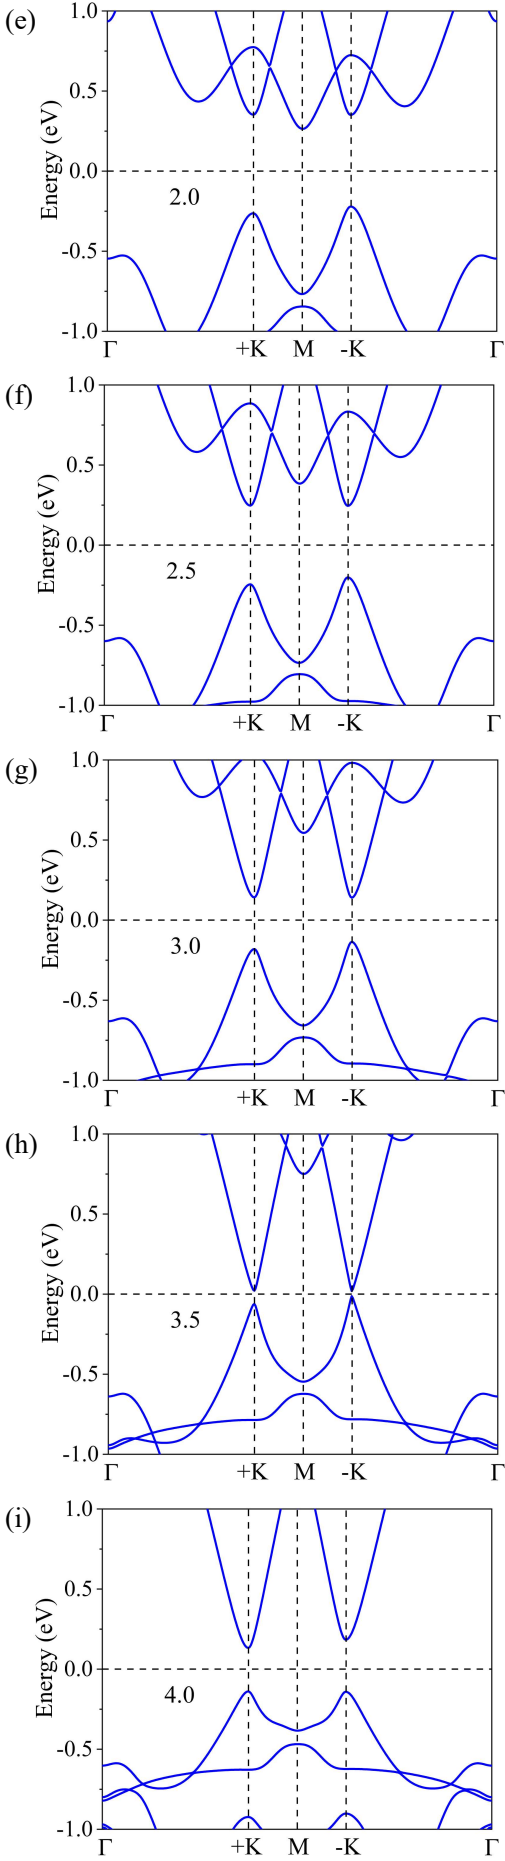

**Fig. S3** The band structures of the VCGeN<sub>4</sub> gained from PBE+*U* method (*U* values vary from 0.0 to 4.0 eV) with OOP

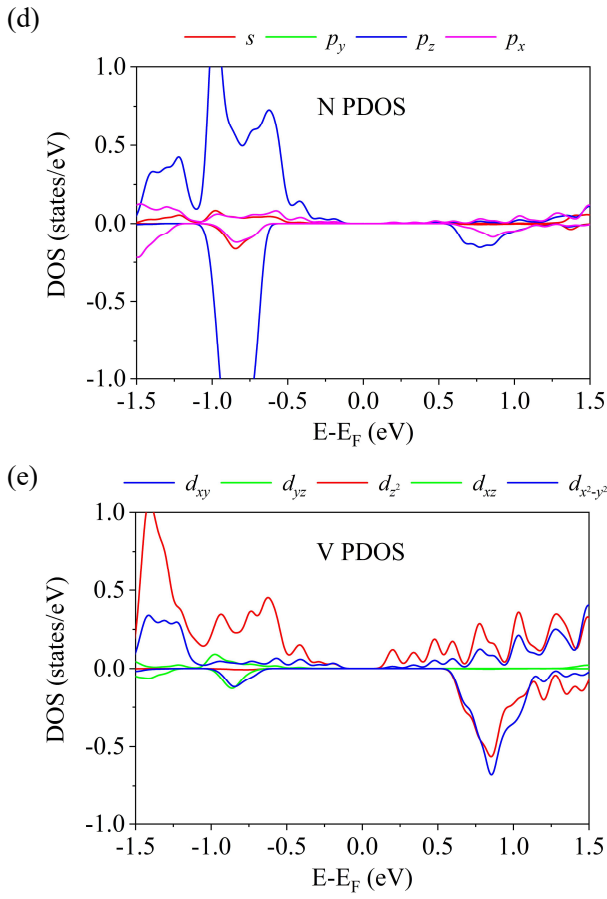

**Fig. S5** (a) The total density of states (DOS) of the VCGeN<sub>4</sub>. (b) The partial density of states (PDOS) of Ge atoms. (c) The PDOS of C atoms. (d) The PDOS of N atoms. (e) The PDOS of V atoms.

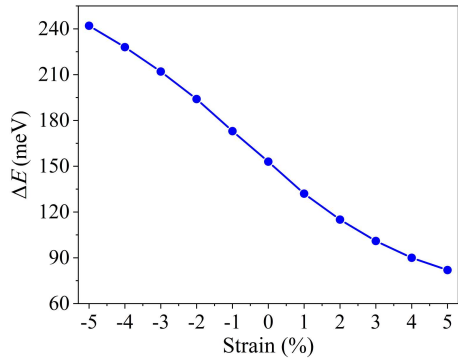

**Fig. S6** The energy differences ( $\Delta E = E_{AFM} - E_{FM}$ ) between FM and AFM configurations of VCGeN<sub>4</sub> as a function of strain.

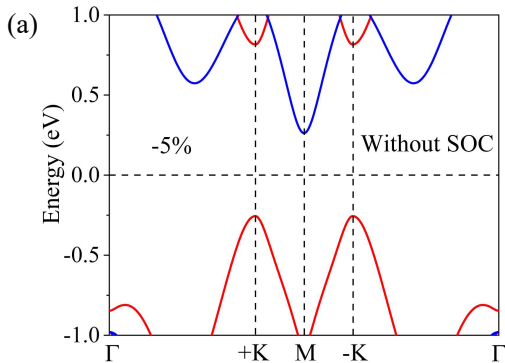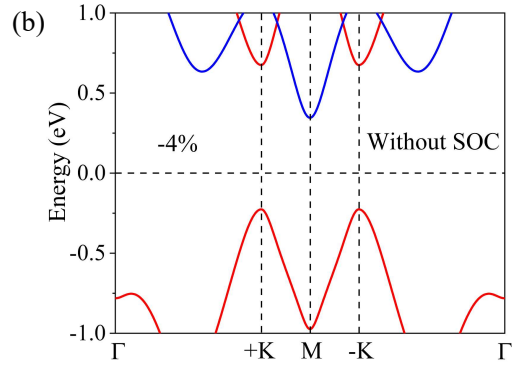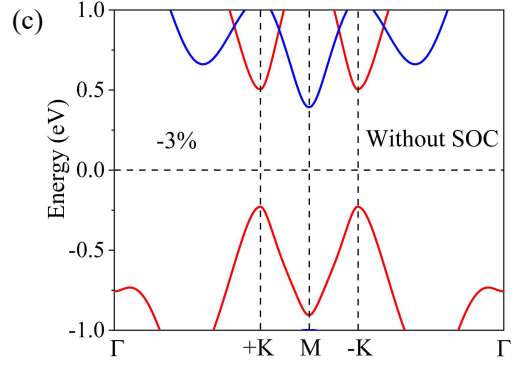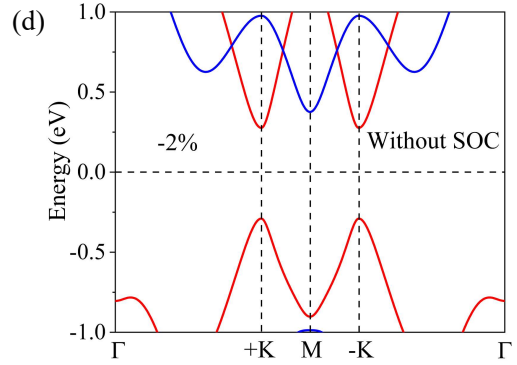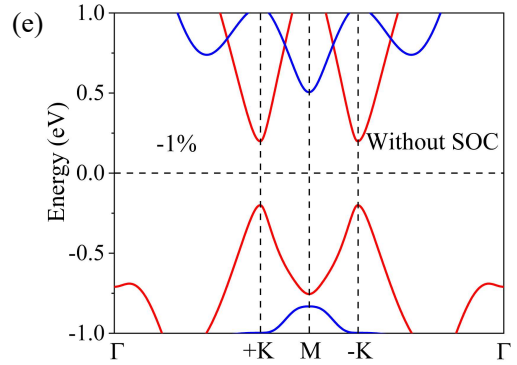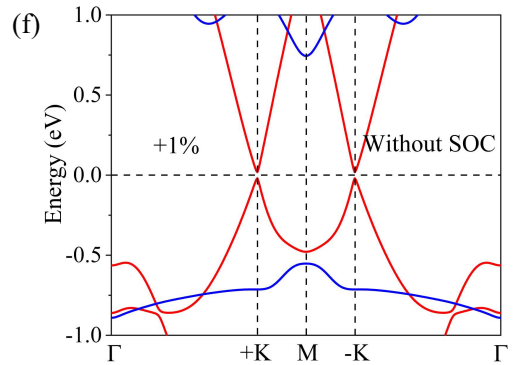

respectively.

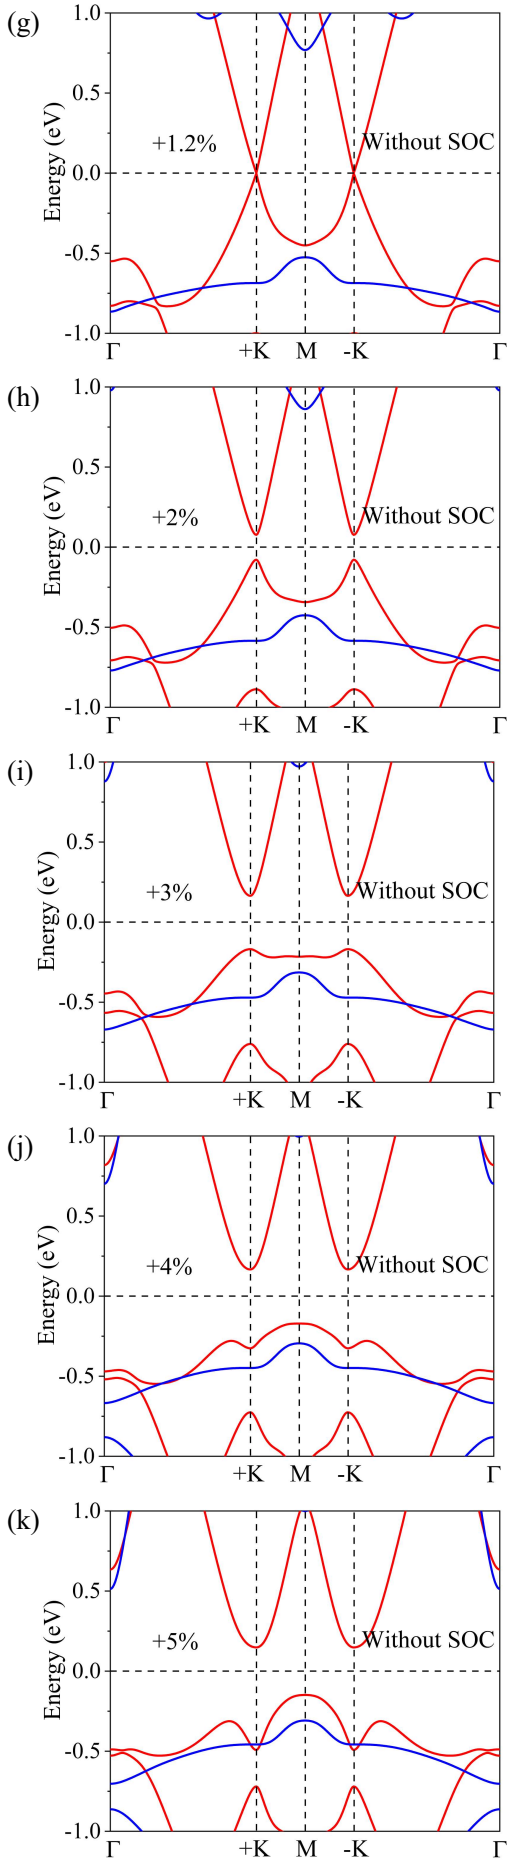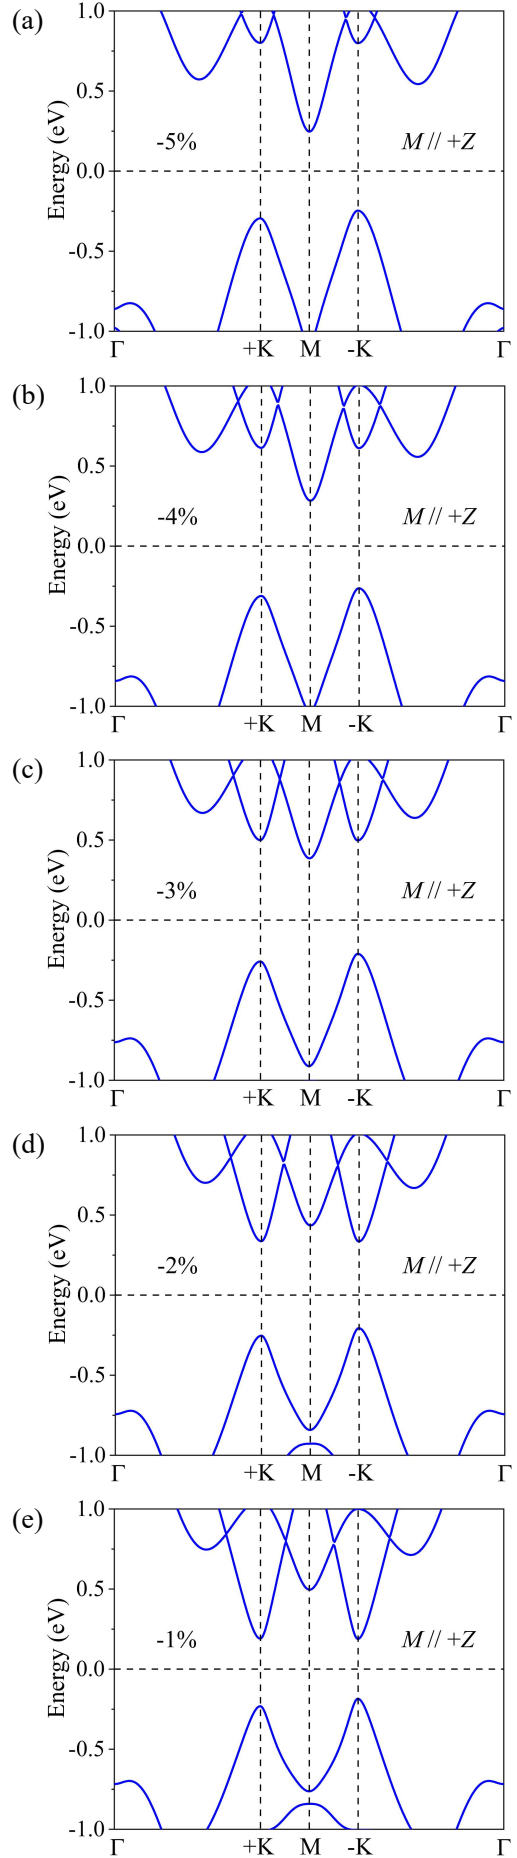

**Fig. S7** The band structures without SOC at different strains. The red and blue lines denote the spin-up and spin-down states,

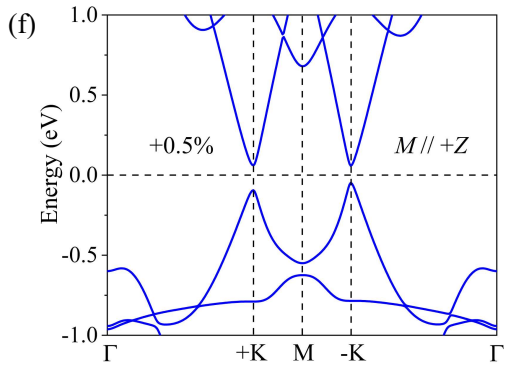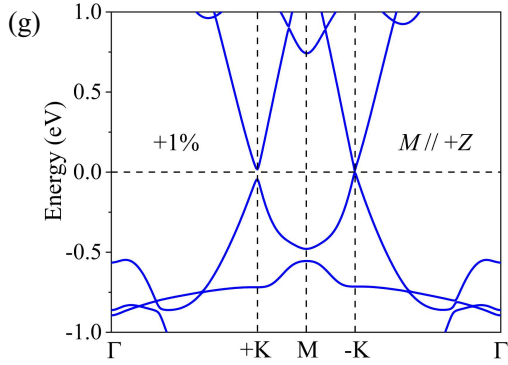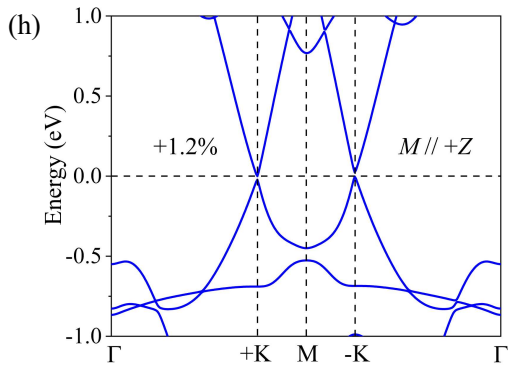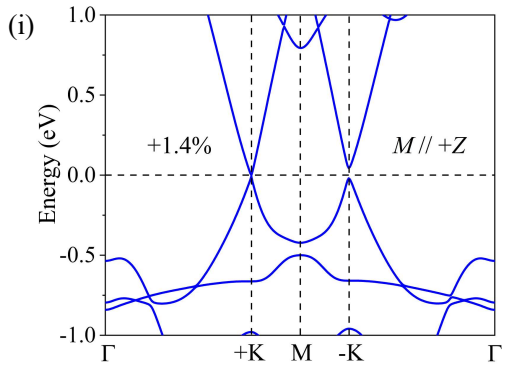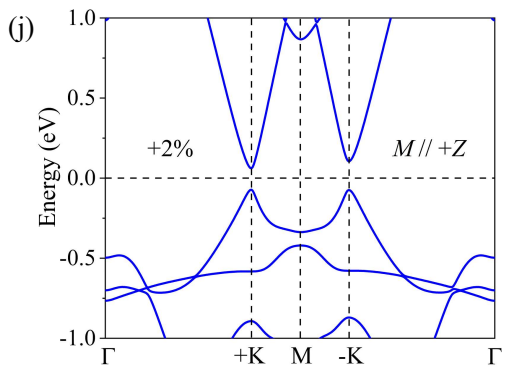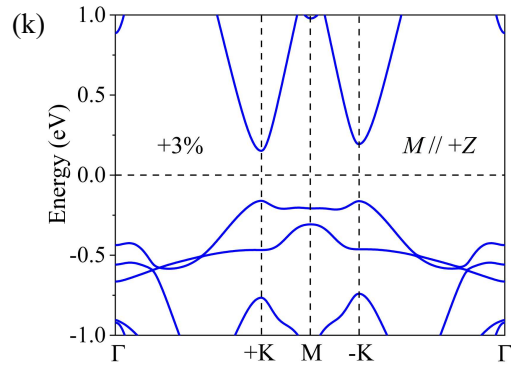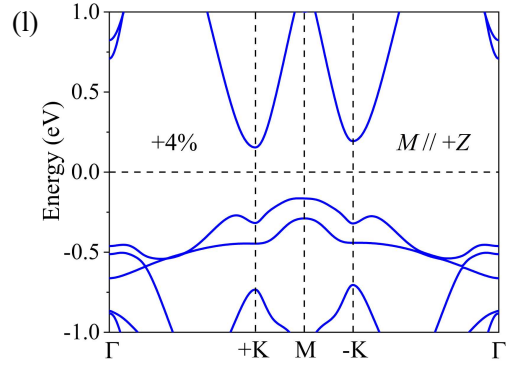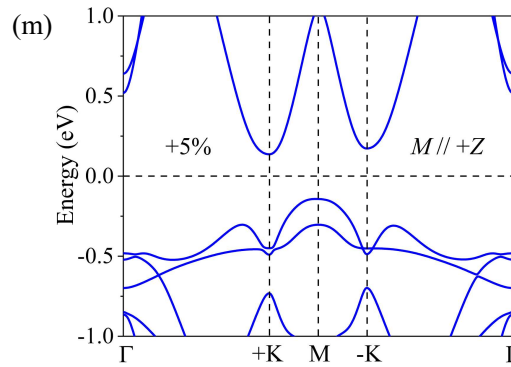

**Fig. S8** The band structures by using GGA+SOC with OOP magnetization at different strains.

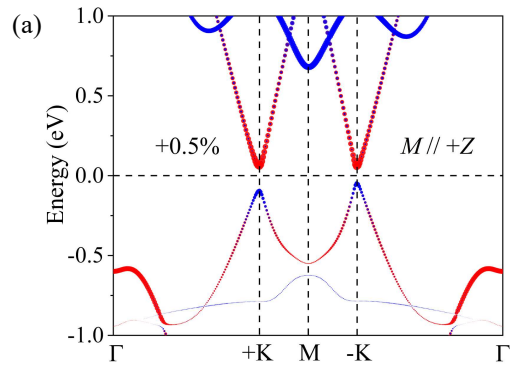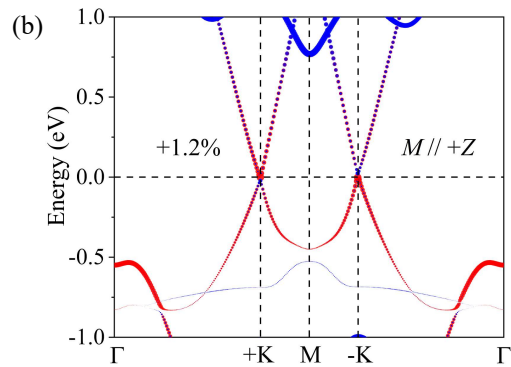

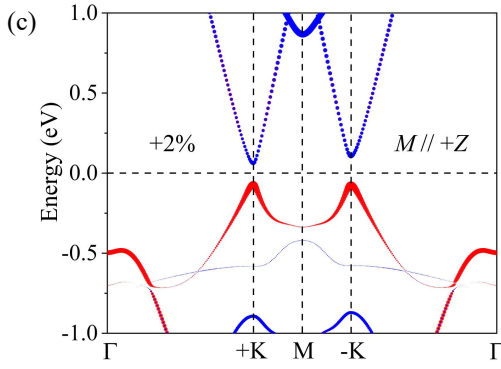

**Fig. S9** For the VCGeN<sub>4</sub> with OOP magnetization, the  $V-d_{z^2}$  and  $d_{x^2-y^2}/d_{xy}$  orbitals character band structures under (a)  $\varepsilon = 0.5\%$ , (b)  $\varepsilon = 1.2\%$ , and (c)  $\varepsilon = 2\%$ .

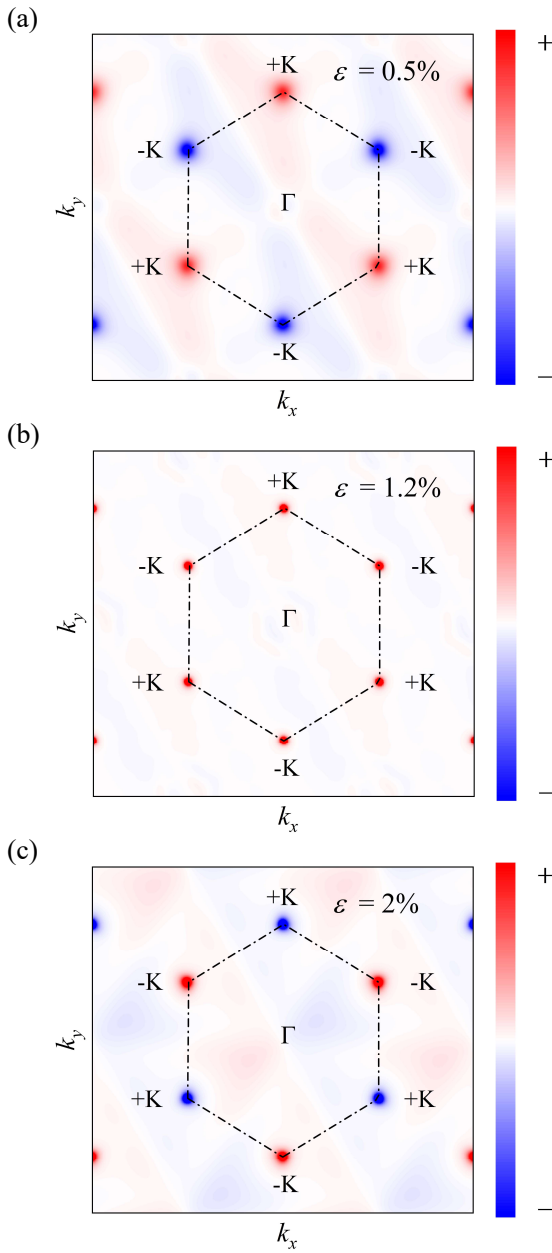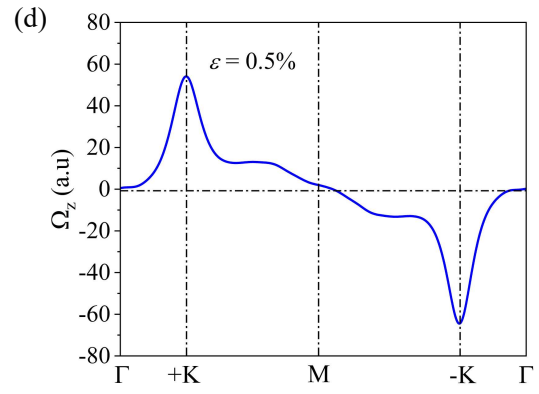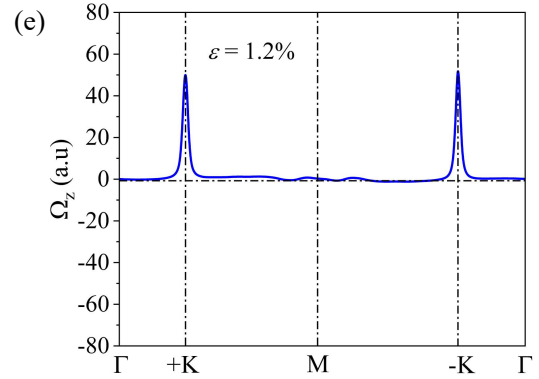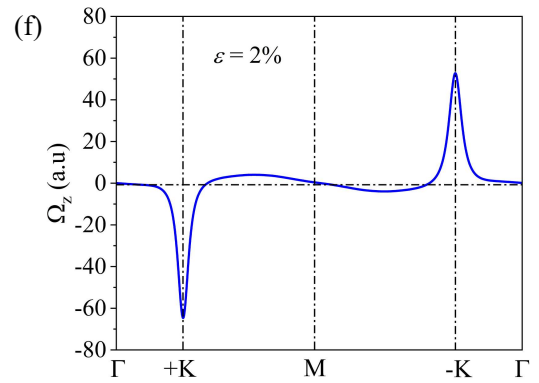

**Fig. S10** The Berry curvature in the 2D BZ under (a)  $\varepsilon = 0.5\%$ , (b)  $\varepsilon = 1.2\%$ , and (c)  $\varepsilon = 2\%$ . The Berry curvature along the high symmetry points under (d)  $\varepsilon = 0.5\%$ , (e)  $\varepsilon = 1.2\%$ , and (f)  $\varepsilon = 2\%$ .

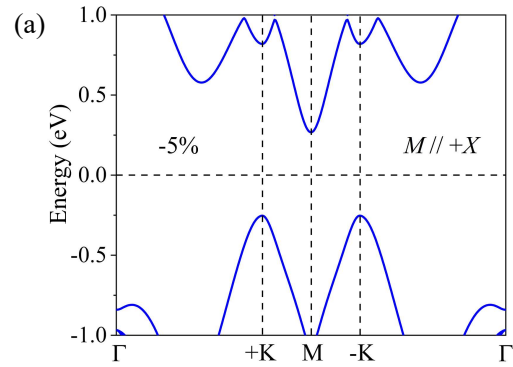

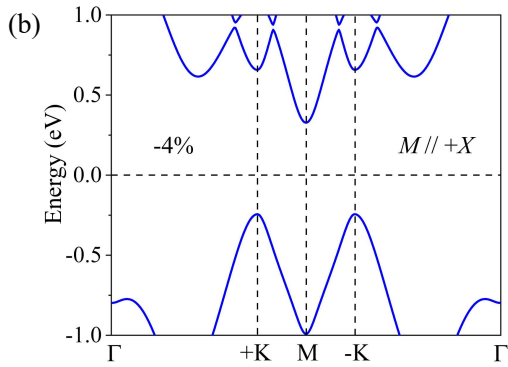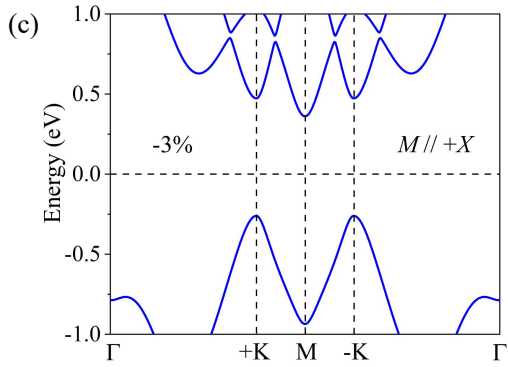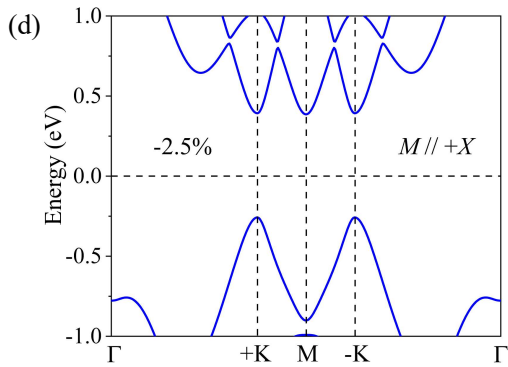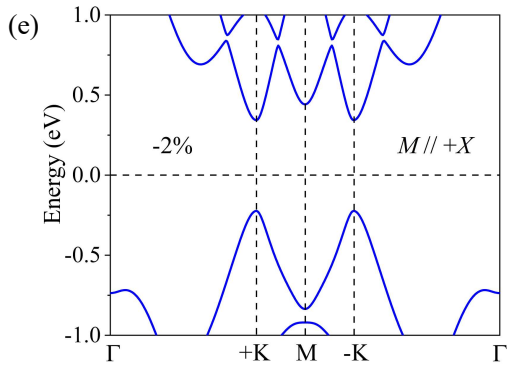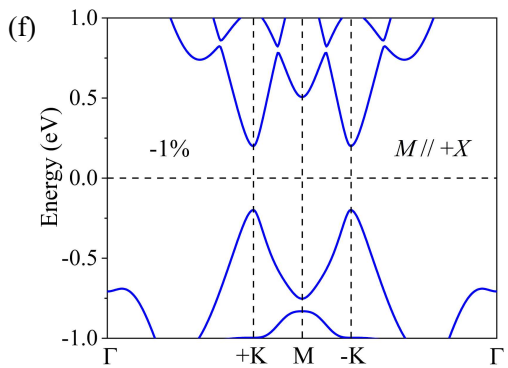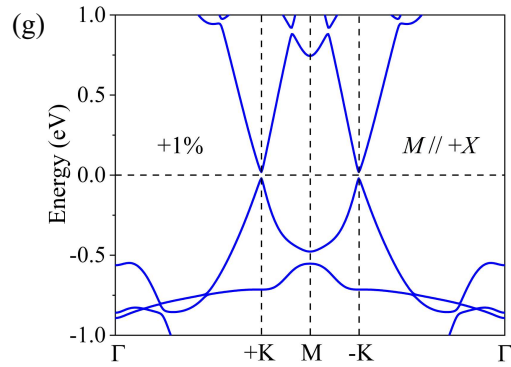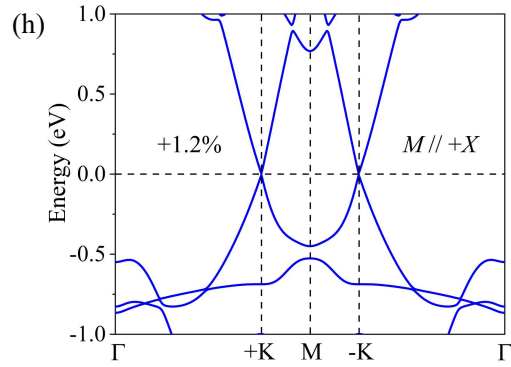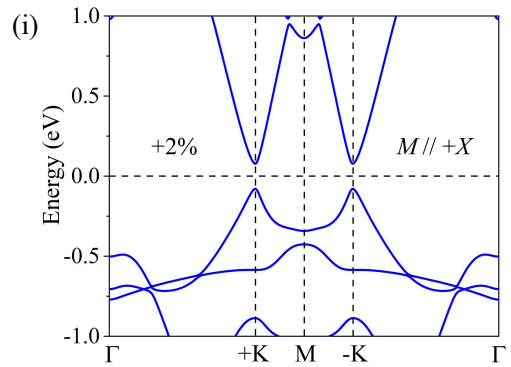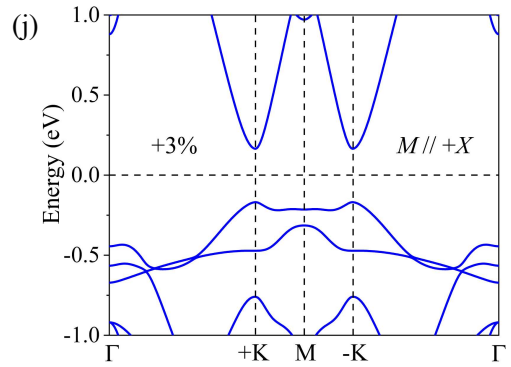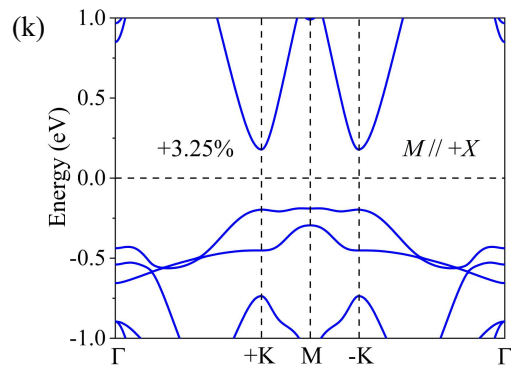

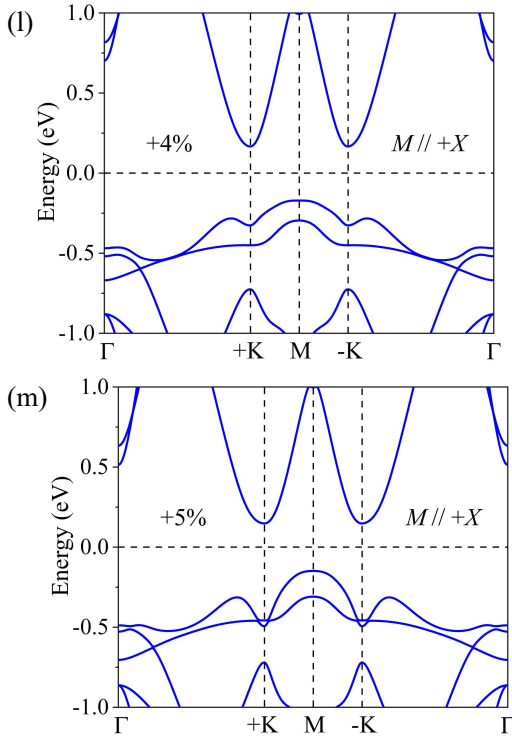

**Fig. S11** The band structures by using GGA+SOC with IP magnetization at different strains.

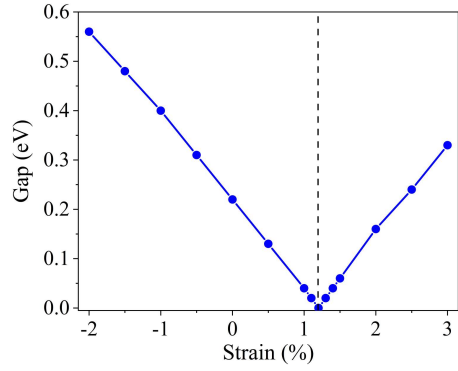

**Fig. S12** The global band gaps with IP magnetization as a function of strain.

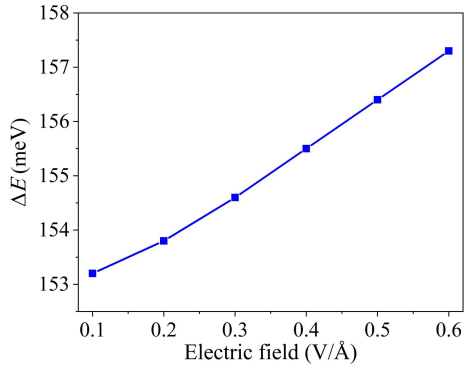

**Fig. S13** The energy differences ( $\Delta E = E_{AFM} - E_{FM}$ ) between FM and AFM configurations of VCGeN<sub>4</sub> as a function of electric field.

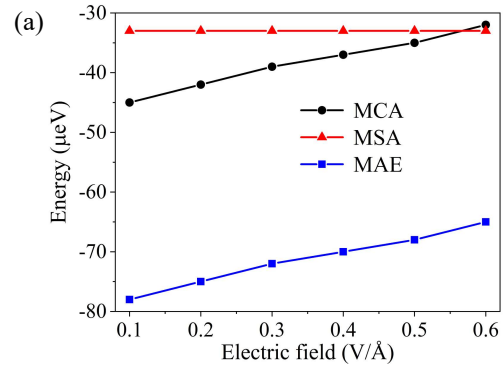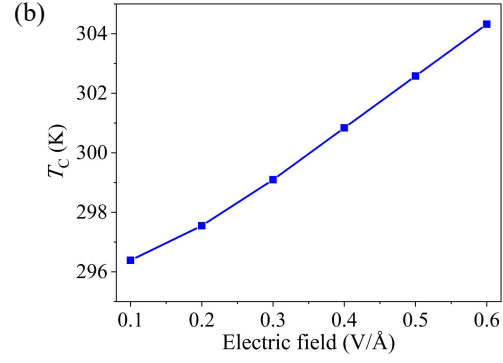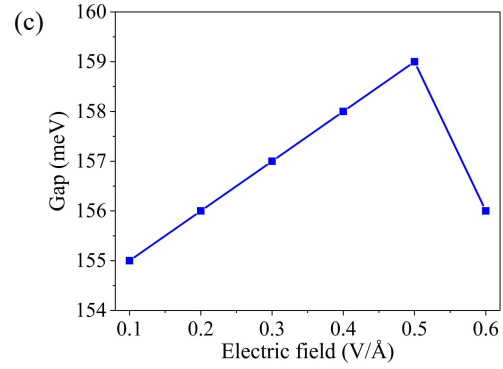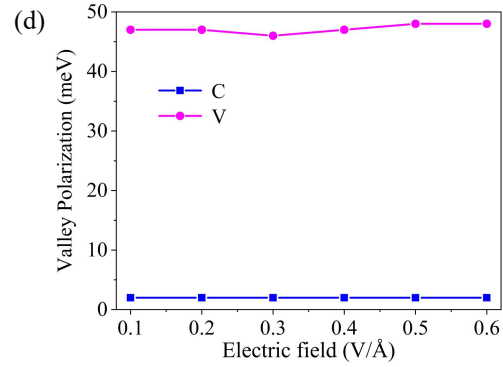

**Fig. S14** For the VCGeN<sub>4</sub>, (a) the MCA energy, MSA energy, and MAE as a function of electric field. (b) The  $T_C$  as a function of electric field. (c) The global band gap as a function of electric field. (d) The VP for the VB and CB as a function of electric field.



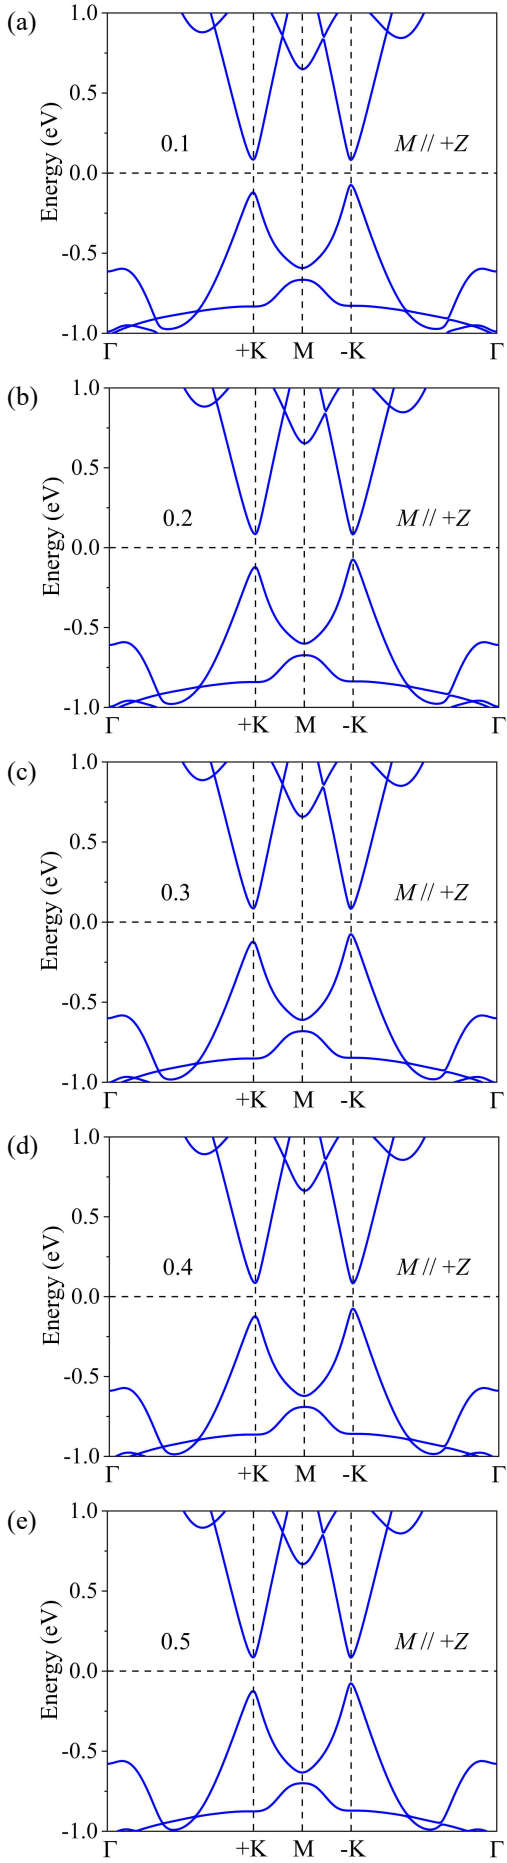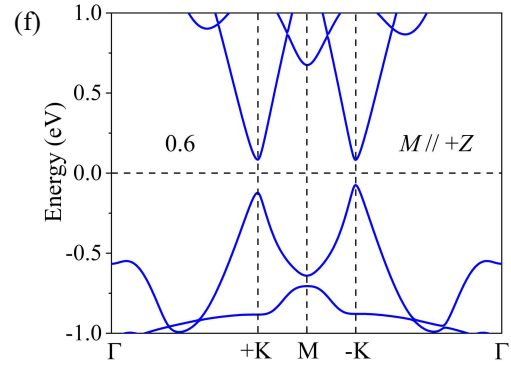

**Fig. S15** For electric field  $E$  between 0.1 and 0.6 V/Å, the band structures by using GGA+SOC with OOP magnetization.

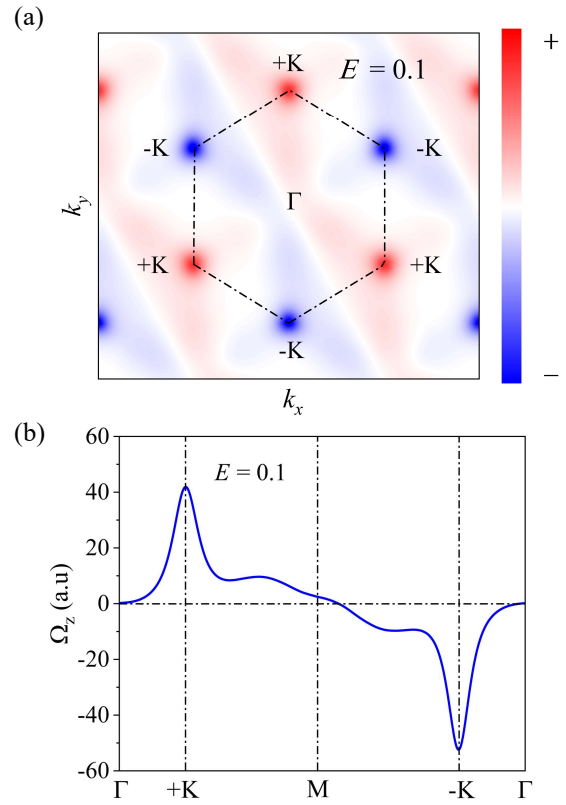

**Fig. S16** For electric field  $E = 0.1$  V/Å, the Berry curvature of VCGeN<sub>4</sub> (a) in the BZ and (b) along the high-symmetry points.
